# Supplementary material
Source: PubMed Central journal article supplement (PMC2358987)
Supplement: JCI0835309sd.pdf [file JCI0835309sd.pdf]

**Supplementary Table 1.** Mice in which a gene within the WBS critical region has been genetically knocked out.

| Gene            | Protein                                    | Genotype | Phenotype                                                                                                                               |
|-----------------|--------------------------------------------|----------|-----------------------------------------------------------------------------------------------------------------------------------------|
| <i>Fkbp6</i>    | FK506-binding protein 6                    | Hom      | Male sterility, aspermia, abnormal synaptonemal complex formation (1)                                                                   |
|                 |                                            | Het      | Apparently normal (1)                                                                                                                   |
| <i>Fzd9</i>     | Frizzled 9                                 | Hom      | Severe loss of cells in dentate gyrus, diminished seizure thresholds, impaired visuospatial learning and memory (2)                     |
|                 |                                            | Het      | Moderate loss of cells in dentate gyrus, diminished seizure thresholds (2)                                                              |
| <i>Stx1a</i>    | Syntaxin 1A                                | Hom      | Impaired long-term potentiation in the hippocampus, impaired conditioned fear, memory consolidation and extinction (3)                  |
|                 |                                            | Het      | Apparently normal (3)                                                                                                                   |
| <i>Eln</i>      | Elastin                                    | Hom      | Neonatal lethal vascular obstructive disease (4)<br>Impaired branching morphogenesis in lungs (5)                                       |
|                 |                                            | Het      | Hypertension, increased vascular stiffness, increased number of elastic lamellae (6) (7)                                                |
| <i>Limk1</i>    | LIM domain kinase 1                        | Hom      | Abnormal dendritic spine morphology, enhanced long-term potentiation in the hippocampus, altered fear response and spatial learning (8) |
| <i>Clip2</i>    | CAP-GLY domain-containing linker protein 2 | Hom      | Growth deficiency, neuroanatomical abnormalities, hippocampal dysfunction, impaired motor coordination (9)                              |
|                 |                                            | Het      | Intermediate phenotype (9)                                                                                                              |
| <i>Gtf2ird1</i> | TF2I repeat domain-containing 1            | Hom      | Growth and craniofacial defects (10)<br>Reduced aggression, fear and altered serotonin metabolism (11)                                  |
|                 |                                            | Het      | Intermediate growth and fear responses (11)                                                                                             |
| <i>Ncf1</i>     | Neutrophil cytosolic factor 1              | Hom      | Increased susceptibility to autoimmune arthritis and encephalomyelitis (12)                                                             |

1. Crackower, M.A., Kolas, N.K., Noguchi, J., Sarao, R., Kikuchi, K., Kaneko, H., Kobayashi, E., Kawai, Y., Kozieradzki, I., Landers, R., et al. 2003. Essential role of *Fkbp6* in male fertility and homologous chromosome pairing in meiosis. *Science* 300:1291-1295.
2. Zhao, C., Aviles, C., Abel, R.A., Almlı, C.R., McQuillen, P., and Pleasure, S.J. 2005. Hippocampal and visuospatial learning defects in mice with a deletion of frizzled 9, a gene in the Williams syndrome deletion interval. *Development* 132:2917-2927.
3. Fujiwara, T., Mishima, T., Kofuji, T., Chiba, T., Tanaka, K., Yamamoto, A., and Akagawa, K. 2006. Analysis of knock-out mice to determine the role of HPC-1/syntaxin 1A in expressing synaptic plasticity. *J Neurosci* 26:5767-5776.
4. Li, D.Y., Brooke, B., Davis, E.C., Mecham, R.P., Sorensen, L.K., Boak, B.B., Eichwald, E., and Keating, M.T. 1998. Elastin is an essential determinant of arterial morphogenesis. *Nature* 393:276-280.

5. Wendel, D.P., Taylor, D.G., Albertine, K.H., Keating, M.T., and Li, D.Y. 2000. Impaired distal airway development in mice lacking elastin. *Am J Respir Cell Mol Biol* 23:320-326.
6. Faury, G., Pezet, M., Knutsen, R.H., Boyle, W.A., Heximer, S.P., McLean, S.E., Minkes, R.K., Blumer, K.J., Kovacs, A., Kelly, D.P., et al. 2003. Developmental adaptation of the mouse cardiovascular system to elastin haploinsufficiency. *J Clin Invest* 112:1419-1428.
7. Li, D.Y., Faury, G., Taylor, D.G., Davis, E.C., Boyle, W.A., Mecham, R.P., Stenzel, P., Boak, B., and Keating, M.T. 1998. Novel arterial pathology in mice and humans hemizygous for elastin. *J Clin Invest* 102:1783-1787.
8. Meng, Y., Zhang, Y., Tregoubov, V., Janus, C., Cruz, L., Jackson, M., Lu, W.Y., MacDonald, J.F., Wang, J.Y., Falls, D.L., et al. 2002. Abnormal spine morphology and enhanced LTP in LIMK-1 knockout mice. *Neuron* 35:121-133.
9. Hoogenraad, C.C., Akhmanova, A., Galjart, N., and De Zeeuw, C.I. 2004. LIMK1 and CLIP-115: linking cytoskeletal defects to Williams syndrome. *Bioessays* 26:141-150.
10. Tassabehji, M., Hammond, P., Karmiloff-Smith, A., Thompson, P., Thorgeirsson, S.S., Durkin, M.E., Popescu, N.C., Hutton, T., Metcalfe, K., Rucka, A., et al. 2005. GTF2IRD1 in craniofacial development of humans and mice. *Science* 310:1184-1187.
11. Young, E.J., Lipina, T., Tam, E., Mandel, A., Clapcote, S.J., Bechard, A.R., Chambers, J., Mount, H.T., Fletcher, P.J., Roder, J.C., et al. 2007. Reduced fear and aggression and altered serotonin metabolism in Gtf2ird1-targeted mice. *Genes Brain Behav* 7:224-234.
12. Hultqvist, M., Olofsson, P., Holmberg, J., Backstrom, B.T., Tordsson, J., and Holmdahl, R. 2004. Enhanced autoimmunity, arthritis, and encephalomyelitis in mice with a reduced oxidative burst due to a mutation in the Ncf1 gene. *Proc Natl Acad Sci U S A* 101:12646-12651.
